# Supplementary material for: Clinical relevance of urinary 8‑hydroxydeoxyguanosine levels in patients undergoing prostate biopsy
Source: PubMed Central journal article supplement — Mol Clin Oncol. 2024 Sep 16;21(5):86. doi: 10.3892/mco.2024.2784 (PMC11428079; doi:10.3892/mco.2024.2784), 2024-09-16

Figure S1. Spearman's rank correlation coefficient between patient risk groups and urinary 8-OHdG levels was calculated (A) without or (B) with prostate volume correction. Risk group 0, benign; risk group 1, low/intermediate risk; risk group 2, high risk; risk group 3, locally advanced; risk group 4, nodal/metastatic. 8-OHdG, 8-hydroxydeoxyguanosine; CI, confidence interval.

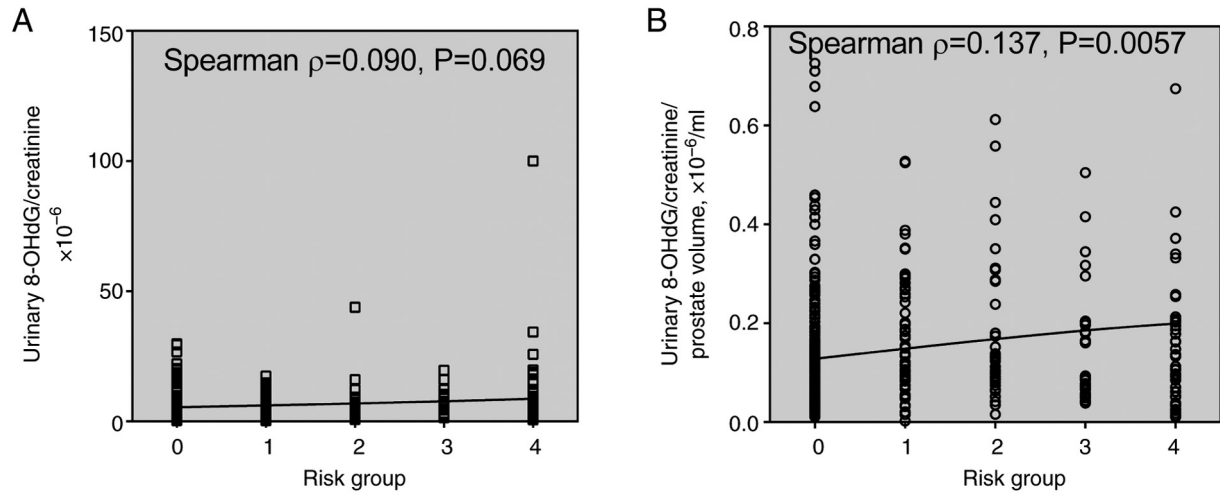

Supplement: Supplementary_Data1.pdf [file Supplementary_Data1.pdf]
