# Supplementary material for: Clinical relevance of urinary 8‑hydroxydeoxyguanosine levels in patients undergoing prostate biopsy
Source: PubMed Central journal article supplement — Mol Clin Oncol. 2024 Sep 16;21(5):86. doi: 10.3892/mco.2024.2784 (PMC11428079; doi:10.3892/mco.2024.2784), 2024-09-16
Supplement: Supplementary_Data2.pdf [file Supplementary_Data2.pdf]

**Table SI.** Linear regression analysis of urinary 8-hydroxydeoxyguanosine/creatinine ratio (n=405).

| <b>Parameter</b> | <b>r-value</b> | <b>95% CI</b> | <b>P-value</b> |
|------------------|----------------|---------------|----------------|
| Age              | -0.010         | -0.107-0.0882 | 0.846          |
| PSA              | 0.019          | -0.079-0.116  | 0.707          |
| Prostate volume  | 0.097          | -0.0008-0.192 | 0.052          |
| PSAD             | 0.003          | -0.098-0.104  | 0.952          |

PSA, prostate-specific antigen; PSAD prostate-specific antigen density; CI, confidence interval.

**Table SII.** Basic characteristics of the studied patients with an initial benign biopsy.

| Parameter                                                | Initially benign | Prostatitis | PIN and atypical gland | Later malignancy | P-value <sup>a</sup> |
|----------------------------------------------------------|------------------|-------------|------------------------|------------------|----------------------|
| Number of patients                                       | 174              | 39          | 9                      | 9                |                      |
| Age, years                                               |                  |             |                        |                  | 0.922                |
| Median                                                   | 66               | 66          | 67                     | 63               |                      |
| Range                                                    | 43-86            | 50-80       | 50-80                  | 55-73            |                      |
| 25-75% percentile                                        | 61, 72           | 60, 72      | 56, 71                 | 61, 70           |                      |
| PSA, ng/ml                                               |                  |             |                        |                  | 0.211                |
| Geometric mean                                           | 7.6              | 8.9         | 7.6                    | 10.9             |                      |
| 95% CI                                                   | 6.9-8.3          | 7.2-11.1    | 4.3-13.4               | 7.0-16.8         |                      |
| Prostate volume, ml                                      |                  |             |                        |                  | 0.506                |
| Mean ± SD                                                | 55.3±27.0        | 55.8±26.4   | 56.5±31.1              | 41.5±24.5        |                      |
| PSAD, ng/ml/ml <sup>b</sup>                              |                  |             |                        |                  | 0.027                |
| Geometric mean                                           | 0.15             | 0.18        | 0.15                   | 0.31             |                      |
| 95% CI                                                   | 0.14-0.17        | 0.14-0.22   | 0.09-0.25              | 0.19-0.50        |                      |
| 8-OHdG/creatinine, x10 <sup>-6</sup>                     |                  |             |                        |                  | 0.165                |
| Geometric mean                                           | 4.3              | 4.7         | 3.6                    | 1.7              |                      |
| 95% CI                                                   | 3.8-4.8          | 3.9-5.7     | 2.0-6.7                | 0.9-3.2          |                      |
| 8-OHdG/creatinine/prostate volume, x10 <sup>-6</sup> /ml |                  |             |                        |                  | 0.625                |
| Median                                                   | 0.09             | 0.09        | 0.07                   | 0.05             |                      |
| 95% CI                                                   | 0.08-0.10        | 0.07-0.11   | 0.03-0.15              | 0.02-0.10        |                      |

<sup>a</sup>One-way ANOVA; <sup>b</sup>initially benign vs. later malignancy, **P=0.0183** using post-hoc analysis with **Tukey's multiple comparisons test**. 8-OHdG, 8-hydroxydeoxyguanosine; PSA, prostate-specific antigen; CI, confidence interval.

**Table III.** Pathological characteristics of patients with PCa according to the time of diagnosis.

| Parameter             | Total | Initial PCa | Later PCa | P-value            |
|-----------------------|-------|-------------|-----------|--------------------|
| Number of patients    | 187   | 178         | 9         |                    |
| Radical prostatectomy | 50    | 45          | 5         |                    |
| Gleason grade         |       |             |           |                    |
| 3+3                   | 23    | 22          | 1         | 0.508 <sup>a</sup> |
| 3+4                   | 9     | 7           | 2         |                    |
| 4+3                   | 5     | 5           | 0         |                    |
| 4+4, 3+5, 5+3         | 7     | 6           | 1         |                    |
| 5+5, 5+4, 4+5         | 6     | 5           | 1         |                    |
| Pathological staging, |       |             |           |                    |
| pT2N0                 | 27    | 26          | 1         | 0.177 <sup>a</sup> |
| pT3aN0                | 10    | 7           | 3         |                    |
| pT3bN0                | 7     | 7           | 0         |                    |
| Any T, N+             | 4     | 3           | 1         |                    |
| Any T, Any N, M+      | 1     | 1           | 0         |                    |
| NEPC                  | 1     | 1           | 0         |                    |

<sup>a</sup>Fisher's exact test. PCa, prostate cancer; CI, confidence interval; SD, standard deviation; NEPC, neuroendocrine prostate cancer.
